# Supplementary material for: A Risk Prediction Model and Risk Score of SARS-CoV-2 Infection Following Healthcare-Related Exposure
Source: MDPI journal article supplement (doi:10.3390/tropicalmed7090248), 2022-09-14

**Supplementary Table S1** Exposure characteristics-based risk classification

| Exposure detail                                                                                                                                                                                                                                                                                                                                                                                                                                             |                        | Duration of contact<br>(Cumulative within<br>24 hours) | Contact risk category |
|-------------------------------------------------------------------------------------------------------------------------------------------------------------------------------------------------------------------------------------------------------------------------------------------------------------------------------------------------------------------------------------------------------------------------------------------------------------|------------------------|--------------------------------------------------------|-----------------------|
| PPE of contact<br>personnel and<br>exposure distance                                                                                                                                                                                                                                                                                                                                                                                                        | PPE of Index cases     |                                                        |                       |
| <ul style="list-style-type: none"> <li>- Surgical mask with eye protection or</li> <li>- Surgical mask with distance &gt;1 meter</li> </ul>                                                                                                                                                                                                                                                                                                                 | Surgical or cloth mask | Any                                                    | Insignificant         |
|                                                                                                                                                                                                                                                                                                                                                                                                                                                             | No mask                | ≤15 minutes                                            | Low                   |
|                                                                                                                                                                                                                                                                                                                                                                                                                                                             | No mask                | >15 minutes                                            | Moderate              |
| <ul style="list-style-type: none"> <li>- Surgical mask with distance ≤1 meter without eye protection</li> </ul>                                                                                                                                                                                                                                                                                                                                             | Surgical or cloth mask | ≤15 minutes                                            | Low                   |
|                                                                                                                                                                                                                                                                                                                                                                                                                                                             | Surgical or cloth mask | >15 minutes                                            | Moderate              |
|                                                                                                                                                                                                                                                                                                                                                                                                                                                             | No mask                | ≤15 minutes                                            | Moderate              |
|                                                                                                                                                                                                                                                                                                                                                                                                                                                             | No mask                | >15 minutes                                            | High                  |
| <ul style="list-style-type: none"> <li>- Contact personnel not wearing a mask</li> <li>- Improper PPE during an aerosol-generating procedure (at least N95 respirator and eye protection)</li> <li>- Direct contacts of mucosa with the aerodigestive secretion of index case without proper hand hygiene or sharing food with the same utensils</li> <li>- Eating together without a barrier board</li> <li>- Close contact in the same vehicle</li> </ul> |                        | Any                                                    | High                  |
| <ul style="list-style-type: none"> <li>- Indirect contacts with fomite of index case without proper hand hygiene</li> </ul>                                                                                                                                                                                                                                                                                                                                 |                        | Any                                                    | Moderate              |
| <ul style="list-style-type: none"> <li>- Eating together with a barrier board</li> </ul>                                                                                                                                                                                                                                                                                                                                                                    |                        | >15 minutes                                            | Moderate              |
| <ul style="list-style-type: none"> <li>- Eating together with a barrier board without talking or sharing food</li> </ul>                                                                                                                                                                                                                                                                                                                                    |                        | ≤15 minutes                                            | Low                   |

**Supplementary Table S2** Management of contact hospital workers in terms of guided testing and quarantine duration based on contact risk and vaccination history

| Contact risk category | Immunization history* | Guidance of testing date after last known contact | Quarantine duration (days) |
|-----------------------|-----------------------|---------------------------------------------------|----------------------------|
| High                  | Immunized             | Immediate, day #7, day #14                        | 7                          |
|                       | Unimmunized           |                                                   | 14                         |
| Moderate              | Immunized             | Day #7, day #14                                   | No                         |
|                       | Unimmunized           |                                                   | 7–14**                     |
| Low                   | Any                   | Once during day #7–14                             | No                         |

\* See Supplementary Table S3

\*\* Depend on the judgement of the division chief according to the extent of staff shortage

**Supplementary Table S3** Definition of immunization during the study period

| Time                       | Factors determine immunity                             |                                                                           |                                                                |
|----------------------------|--------------------------------------------------------|---------------------------------------------------------------------------|----------------------------------------------------------------|
|                            | Number of total vaccine doses                          | Vaccine regimens                                                          | Minimum duration (days) from last shot to the date of exposure |
| Before August 27, 2021     | 2                                                      | CoronaVac                                                                 | 14                                                             |
|                            | 1                                                      | ChAdOx-1                                                                  | 28                                                             |
|                            | OR previous COVID-19 infection within the past 90 days |                                                                           |                                                                |
| August 27, 2021, and later | 3                                                      | 2 of CoronaVac + booster with mRNA or ChAdOx-1                            | 14                                                             |
|                            | 3                                                      | Inactivated vaccine                                                       | 28                                                             |
|                            | 2                                                      | 2 of mRNA or 2 ChAdOx-1 or Inactivated vaccine+ChAdOx-1 or ChAdOx-1+ mRNA | 14                                                             |
|                            | OR previous COVID-19 infection within the past 90 days |                                                                           |                                                                |
|                            |                                                        |                                                                           |                                                                |

**Supplementary Table S4** Vaccine regimen potency grouping, adapted from Thai COVID-19 vaccination guidelines for a booster shot from the Ministry of Public Health as of December 2021.

| Potency group | Vaccination history |                                                | Recommended booster duration after last shot |
|---------------|---------------------|------------------------------------------------|----------------------------------------------|
|               | Doses               | Regimens                                       |                                              |
| Low           | 1–3                 | Inactivated vaccine (CoronaVac or BBIBP)       | 4 weeks                                      |
|               | 1                   | ChAdOx-1 or mRNA                               | 4–12 weeks                                   |
| Moderate      | 3                   | 2 inactivated vaccines plus 1 ChAdOx-1 or mRNA | 3 months                                     |
|               | 2                   | ChAdOx-1                                       | 3 months                                     |

|      |           |                                               |                         |
|------|-----------|-----------------------------------------------|-------------------------|
|      | 2         | Inactivated vaccine plus ChAdOx-1 or mRNA     | 3 months                |
| High | 3 or more | Contain at least ChAdOx-1 plus mRNA or 2 mRNA | Booster not recommended |
|      | 2         | mRNA (BNT162b2 or mRNA-1273)                  | 6 months                |
|      | 2         | ChAdOx-1 plus mRNA                            | 6 months                |

**Supplementary Table S5** Parallel analysis of variables associated with SARS-CoV-2 infection using exposure risk category, the final logistic model

| <b>Risk factor</b>                                       | <b><math>\beta</math></b> | <b>Adjusted odds Ratio (95% CI)</b> | <b>P-value</b> |
|----------------------------------------------------------|---------------------------|-------------------------------------|----------------|
| The highest education attainment                         |                           |                                     | 0.000          |
| Primary or secondary school (reference)                  |                           |                                     |                |
| Undergraduate (associate's or bachelor's)                | -0.66                     | 0.52 (0.4–0.67)                     | 0.000          |
| Postgraduate (master's or doctoral)                      | -1.25                     | 0.29 (0.17–0.48)                    | 0.000          |
| Exposure risk category                                   |                           |                                     | 0.000          |
| Low risk (reference)                                     |                           |                                     |                |
| Moderate risk                                            | 0.95                      | 2.57 (1.44–4.59)                    | 0.001          |
| High risk                                                | 2.14                      | 8.53 (5.16–14.1)                    | 0.000          |
| Insignificant risk with symptom(s) or reasons for RT-PCR | 0.89                      | 2.43 (1.23–4.78)                    | 0.010          |
| Fever or other COVID-19 related symptoms                 | 1.67                      | 5.31 (4.10–6.88)                    | 0.000          |
| Vaccination group                                        |                           |                                     | 0.000          |
| Unvaccinated (reference)                                 |                           |                                     |                |
| Low potency                                              | -1.08                     | 0.34 (0.2–0.59)                     | 0.000          |
| Moderate potency                                         | -1.52                     | 0.22 (0.12–0.39)                    | 0.000          |
| High potency                                             | -2.68                     | 0.07 (0.01–0.53)                    | 0.010          |
| Constant                                                 | -3.68                     |                                     | 0.000          |

**Supplementary Figure S1** Daily number and cumulative percentage of occupational exposures among healthcare personnel in the study, 15 September to 31 December 2021

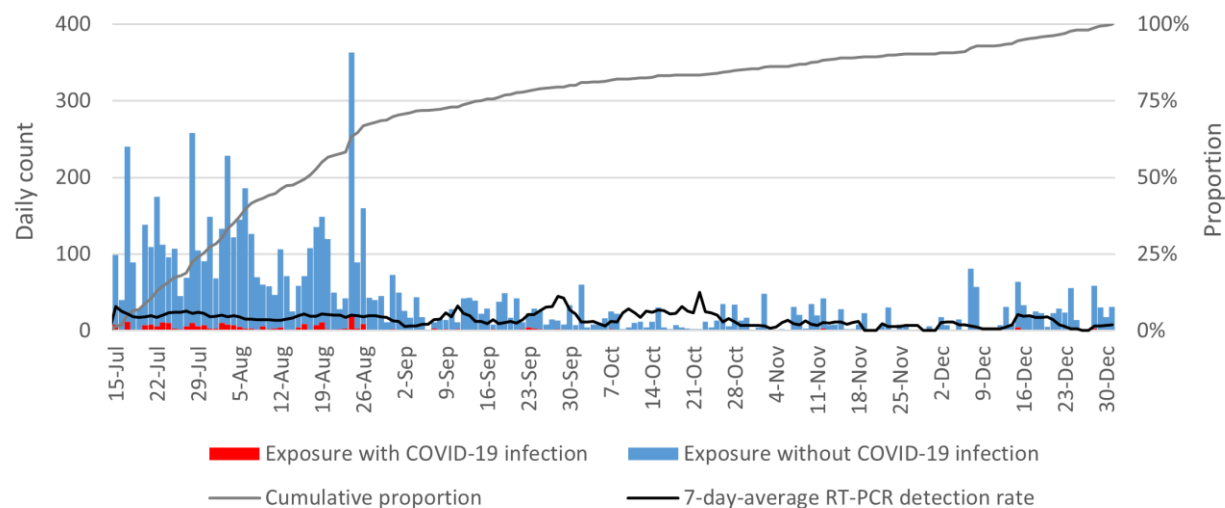

**Supplementary Figure S2** Distribution of SARS-CoV-2 PCR assay detection day after last known exposure

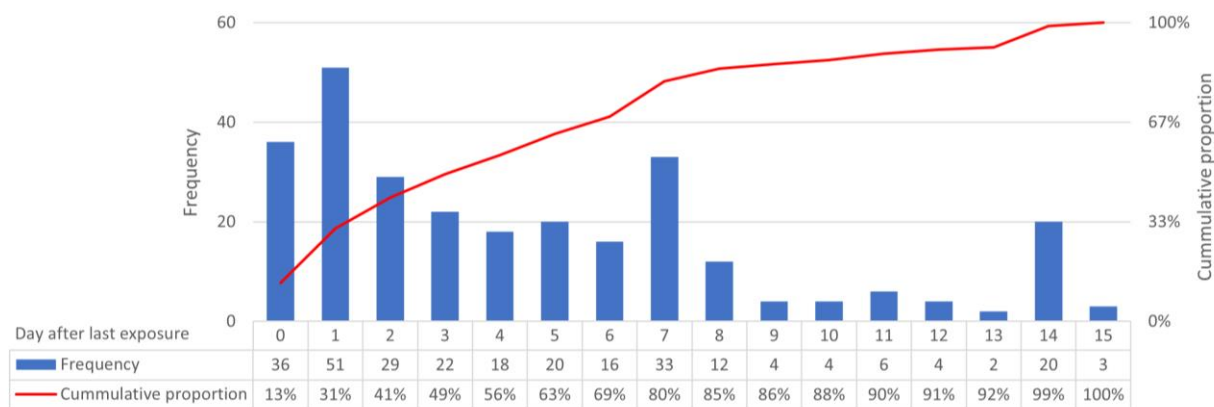

Supplement: s1 [file s1]
